# Supplementary material for: Anti-Allergic and Antioxidant Potential of Polyphenol-Enriched Fractions from Cyclopia subternata (Honeybush) Produced by a Scalable Process
Source: MDPI journal article supplement (doi:10.3390/separations9100278), 2022-10-01
Supplement: s1 [file s1]

## SUPPLEMENTARY MATERIAL

# Anti-allergic and Antioxidant Potential of Polyphenol-Enriched Fractions from *Cyclopia subternata* (Honeybush) Produced by a Scalable Process

Carla Dippenaar <sup>1,2</sup>, Hitoshi Shimbo <sup>3</sup>, Kazunobu Okon <sup>3</sup>, Neil Miller <sup>1</sup>, Elizabeth Joubert <sup>1,2</sup>, Tadashi Yoshida <sup>3,\*</sup> and Dalene de Beer <sup>1,2,\*</sup>

<sup>1</sup> Plant Bioactives Group, Post-Harvest & Agro-Processing Technologies Division, Agricultural Research Council, Stellenbosch, South Africa;

<sup>2</sup> Department of Food Science, Stellenbosch University, Stellenbosch, South Africa;

<sup>3</sup> Department of Applied Biological Science, Tokyo University of Agriculture and Technology, Tokyo, Japan.

\* Correspondence: DBeerD@arc.agric.za (DB) or tyoshi@cc.tuat.ac.jp (TY).

**Table S1** Adsorption capacity (mg/g) of XAD 1180N and HP20 macroporous resins for *Cyclopia subternata* phenolic compounds as a function of sample concentration (mg/mL)

| Resin     | Sample concentration (mg/mL) | Adsorption capacity (mg g <sup>-1</sup> ) |                            |                            |                            |                            |                            |                            |                            |                            |                            |                            |
|-----------|------------------------------|-------------------------------------------|----------------------------|----------------------------|----------------------------|----------------------------|----------------------------|----------------------------|----------------------------|----------------------------|----------------------------|----------------------------|
|           |                              | IDG                                       | IMG                        | PDG                        | HPDG                       | Eriocitrin                 | Hesperidin                 | Mangiferin                 | Isomangiferin              | Vicenin-2                  | Scolymoside                | <i>p</i> -Coumaric acid    |
| XAD 1180N | 1                            | 0.447 <sup>i</sup> ± 0.004                | 0.148 <sup>j</sup> ± 0.001 | 0.279 <sup>h</sup> ± 0.002 | 0.064 <sup>k</sup> ± 0.000 | 0.099 <sup>j</sup> ± 0.001 | 0.163 <sup>j</sup> ± 0.001 | 0.333 <sup>k</sup> ± 0.002 | 0.092 <sup>i</sup> ± 0.001 | 0.035 <sup>j</sup> ± 0.000 | 0.169 <sup>k</sup> ± 0.001 | 0.005 <sup>j</sup> ± 0.000 |
|           | 2                            | 0.873 <sup>g</sup> ± 0.005                | 0.269 <sup>j</sup> ± 0.001 | 0.518 <sup>g</sup> ± 0.002 | 0.125 <sup>i</sup> ± 0.000 | 0.185 <sup>h</sup> ± 0.001 | 0.295 <sup>j</sup> ± 0.001 | 0.600 <sup>j</sup> ± 0.002 | 0.172 <sup>h</sup> ± 0.001 | 0.067 <sup>i</sup> ± 0.000 | 0.318 <sup>j</sup> ± 0.001 | 0.008 <sup>h</sup> ± 0.000 |
|           | 3                            | 1.303 <sup>f</sup> ± 0.002                | 0.409 <sup>h</sup> ± 0.001 | 0.803 <sup>f</sup> ± 0.003 | 0.194 <sup>g</sup> ± 0.001 | 0.290 <sup>g</sup> ± 0.001 | 0.476 <sup>f</sup> ± 0.002 | 0.991 <sup>g</sup> ± 0.003 | 0.292 <sup>f</sup> ± 0.001 | 0.111 <sup>g</sup> ± 0.000 | 0.541 <sup>g</sup> ± 0.002 | 0.014 <sup>f</sup> ± 0.000 |
|           | 5                            | 2.137 <sup>e</sup> ± 0.014                | 0.688 <sup>e</sup> ± 0.004 | 1.365 <sup>d</sup> ± 0.010 | 0.336 <sup>e</sup> ± 0.002 | 0.492 <sup>e</sup> ± 0.003 | 0.796 <sup>d</sup> ± 0.006 | 1.683 <sup>e</sup> ± 0.011 | 0.494 <sup>d</sup> ± 0.003 | 0.182 <sup>e</sup> ± 0.001 | 0.947 <sup>e</sup> ± 0.007 | 0.024 <sup>d</sup> ± 0.000 |
|           | 7.5                          | 3.812 <sup>b</sup> ± 0.010                | 0.996 <sup>d</sup> ± 0.002 | 2.026 <sup>c</sup> ± 0.005 | 0.512 <sup>c</sup> ± 0.001 | 0.726 <sup>d</sup> ± 0.002 | 1.178 <sup>c</sup> ± 0.003 | 2.516 <sup>d</sup> ± 0.006 | 0.752 <sup>c</sup> ± 0.002 | 0.268 <sup>c</sup> ± 0.001 | 1.458 <sup>d</sup> ± 0.004 | 0.035 <sup>c</sup> ± 0.000 |
|           | 10                           | 5.080 <sup>a</sup> ± 0.010                | 1.284 <sup>a</sup> ± 0.000 | 2.663 <sup>b</sup> ± 0.005 | 0.679 <sup>a</sup> ± 0.001 | 0.956 <sup>b</sup> ± 0.002 | 1.529 <sup>b</sup> ± 0.003 | 3.313 <sup>b</sup> ± 0.005 | 1.007 <sup>a</sup> ± 0.001 | 0.354 <sup>a</sup> ± 0.001 | 1.938 <sup>b</sup> ± 0.004 | 0.046 <sup>a</sup> ± 0.000 |
| HP20      | 1                            | 0.448 <sup>i</sup> ± 0.001                | 0.153 <sup>j</sup> ± 0.001 | 0.267 <sup>i</sup> ± 0.001 | 0.058 <sup>j</sup> ± 0.000 | 0.094 <sup>j</sup> ± 0.000 | 0.151 <sup>k</sup> ± 0.001 | 0.303 <sup>j</sup> ± 0.001 | 0.086 <sup>j</sup> ± 0.000 | 0.034 <sup>j</sup> ± 0.000 | 0.154 <sup>j</sup> ± 0.001 | 0.004 <sup>j</sup> ± 0.000 |
|           | 2                            | 0.838 <sup>h</sup> ± 0.008                | 0.276 <sup>j</sup> ± 0.001 | 0.526 <sup>g</sup> ± 0.001 | 0.114 <sup>j</sup> ± 0.000 | 0.187 <sup>h</sup> ± 0.001 | 0.301 <sup>h</sup> ± 0.001 | 0.616 <sup>j</sup> ± 0.002 | 0.171 <sup>h</sup> ± 0.000 | 0.068 <sup>j</sup> ± 0.000 | 0.332 <sup>j</sup> ± 0.001 | 0.007 <sup>j</sup> ± 0.000 |
|           | 3                            | 1.300 <sup>f</sup> ± 0.019                | 0.426 <sup>g</sup> ± 0.009 | 0.809 <sup>f</sup> ± 0.005 | 0.188 <sup>h</sup> ± 0.001 | 0.286 <sup>g</sup> ± 0.002 | 0.466 <sup>g</sup> ± 0.003 | 0.948 <sup>h</sup> ± 0.007 | 0.269 <sup>g</sup> ± 0.002 | 0.106 <sup>h</sup> ± 0.001 | 0.521 <sup>h</sup> ± 0.003 | 0.012 <sup>g</sup> ± 0.001 |
|           | 5                            | 2.506 <sup>d</sup> ± 0.015                | 0.678 <sup>f</sup> ± 0.010 | 1.294 <sup>e</sup> ± 0.008 | 0.312 <sup>f</sup> ± 0.002 | 0.458 <sup>f</sup> ± 0.003 | 0.729 <sup>e</sup> ± 0.004 | 1.542 <sup>f</sup> ± 0.011 | 0.446 <sup>e</sup> ± 0.003 | 0.169 <sup>f</sup> ± 0.001 | 0.865 <sup>f</sup> ± 0.005 | 0.021 <sup>e</sup> ± 0.000 |
|           | 7.5                          | 3.769 <sup>c</sup> ± 0.018                | 1.045 <sup>c</sup> ± 0.000 | 2.024 <sup>c</sup> ± 0.009 | 0.502 <sup>d</sup> ± 0.002 | 0.730 <sup>c</sup> ± 0.003 | 1.182 <sup>c</sup> ± 0.006 | 2.604 <sup>c</sup> ± 0.000 | 0.753 <sup>c</sup> ± 0.000 | 0.263 <sup>d</sup> ± 0.000 | 1.519 <sup>c</sup> ± 0.007 | 0.037 <sup>b</sup> ± 0.000 |
|           | 10                           | 5.069 <sup>a</sup> ± 0.005                | 1.275 <sup>b</sup> ± 0.010 | 2.704 <sup>a</sup> ± 0.003 | 0.669 <sup>b</sup> ± 0.001 | 0.973 <sup>a</sup> ± 0.001 | 1.569 <sup>a</sup> ± 0.002 | 3.356 <sup>a</sup> ± 0.000 | 0.978 <sup>b</sup> ± 0.000 | 0.344 <sup>b</sup> ± 0.000 | 2.025 <sup>a</sup> ± 0.002 | 0.045 <sup>a</sup> ± 0.000 |

Different letters in the same column indicate significant differences ( $p < 0.05$ ). Data are given as mean ± standard deviation ( $n = 3$ ). *Abbreviations*: IDG, 3-β-D-glucopyranosyl-4-O-β-D-glucopyranosyliriflophenone; IMG, 3-β-D-glucopyranosyliriflophenone; HPDG, 3',5'-di-β-D-glucopyranosyl-3-hydroxyphloretin; PDG, 3',5'-di-β-D-glucopyranosylphloretin.

**Table S2** Adsorption ratios (%) for *Cyclopia subternata* phenolic compounds on XAD 1180N and HP20 macroporous resins as a function of sample concentration (mg/mL)

| Macroporous resin | Sample concentration (mg/mL) | Adsorption ratio (%)     |                          |                          |                          |                          |
|-------------------|------------------------------|--------------------------|--------------------------|--------------------------|--------------------------|--------------------------|
|                   |                              | IDG <sup>a</sup>         | IMG <sup>b</sup>         | Mangiferin               | Isomangiferin            | <i>p</i> -Coumaric acid  |
| XAD 1180N         | 1                            | 88.5 <sup>a</sup> ± 0.9  | 100.0 <sup>a</sup> ± 0.0 | 99.3 <sup>a</sup> ± 0.1  | 100.0 <sup>a</sup> ± 0.0 | 91.9 <sup>b</sup> ± 0.6  |
|                   | 2                            | 87.5 <sup>a</sup> ± 0.3  | 96.7 <sup>b</sup> ± 0.1  | 99.1 <sup>b</sup> ± 0.0  | 99.1 <sup>b</sup> ± 0.0  | 92.3 <sup>ab</sup> ± 0.1 |
|                   | 3                            | 86.0 <sup>b</sup> ± 0.2  | 96.3 <sup>c</sup> ± 0.1  | 99.0 <sup>b</sup> ± 0.0  | 99.0 <sup>b</sup> ± 0.0  | 91.7 <sup>bc</sup> ± 0.3 |
|                   | 5                            | 83.3 <sup>c</sup> ± 0.1  | 94.9 <sup>d</sup> ± 0.1  | 98.8 <sup>c</sup> ± 0.0  | 98.7 <sup>c</sup> ± 0.0  | 91.6 <sup>bc</sup> ± 0.0 |
|                   | 7.5                          | 78.5 <sup>d</sup> ± 0.4  | 93.1 <sup>f</sup> ± 0.1  | 98.4 <sup>d</sup> ± 0.0  | 98.3 <sup>d</sup> ± 0.0  | 90.4 <sup>cd</sup> ± 0.2 |
|                   | 10                           | 72.2 <sup>f</sup> ± 0.6  | 90.6 <sup>g</sup> ± 0.2  | 97.8 <sup>e</sup> ± 0.1  | 97.6 <sup>f</sup> ± 0.1  | 89.3 <sup>de</sup> ± 0.3 |
| HP20              | 1                            | 87.6 <sup>a</sup> ± 0.5  | 100.0 <sup>a</sup> ± 0.0 | 99.1 <sup>ab</sup> ± 0.1 | 100.0 <sup>a</sup> ± 0.0 | 93.5 <sup>a</sup> ± 0.4  |
|                   | 2                            | 84.3 <sup>c</sup> ± 0.9  | 100.0 <sup>a</sup> ± 0.0 | 98.8 <sup>c</sup> ± 0.1  | 98.5 <sup>c</sup> ± 0.1  | 80.7 <sup>g</sup> ± 1.2  |
|                   | 3                            | 84.5 <sup>c</sup> ± 2.1  | 97.1 <sup>b</sup> ± 0.7  | 98.8 <sup>c</sup> ± 0.2  | 98.6 <sup>c</sup> ± 0.3  | 88.4 <sup>e</sup> ± 2.2  |
|                   | 5                            | 76.8 <sup>e</sup> ± 1.1  | 93.5 <sup>ef</sup> ± 0.5 | 97.8 <sup>e</sup> ± 0.2  | 97.6 <sup>f</sup> ± 0.2  | 86.5 <sup>f</sup> ± 0.8  |
|                   | 7.5                          | 77.1 <sup>de</sup> ± 0.0 | 93.7 <sup>e</sup> ± 0.0  | 98.3 <sup>d</sup> ± 0.0  | 98.0 <sup>e</sup> ± 0.0  | 89.3 <sup>de</sup> ± 0.3 |
|                   | 10                           | 62.5 <sup>g</sup> ± 0.9  | 86.4 <sup>h</sup> ± 0.4  | 95.6 <sup>f</sup> ± 0.0  | 94.6 <sup>g</sup> ± 0.0  | 85.6 <sup>f</sup> ± 1.3  |

Different letters in the same column indicate significant differences ( $p < 0.05$ ). Data are given as mean ± standard deviation ( $n = 3$ ). *Abbreviations:* IDG, 3-β-D-glucopyranosyl-4-O-β-D-glucopyranosyliriflophenone; IMG, 3-β-D-glucopyranosyliriflophenone.

**Table S3** Phenolic compounds identified in a green *Cyclopia subternata* hot water extract and four enriched fractions using high-resolution mass spectrometry in the negative ionisation mode

| Nr | t <sub>R</sub><br>(min) | λ <sub>max</sub> (nm) | [M-H] <sup>-</sup><br>(m/z) | Error<br>(ppm) | Formula                                         | MS <sup>E</sup> fragments (m/z)                                  | Compounds                                               | Extract | F1 | F2 | F3 | F4 |
|----|-------------------------|-----------------------|-----------------------------|----------------|-------------------------------------------------|------------------------------------------------------------------|---------------------------------------------------------|---------|----|----|----|----|
| 1  | 2.7                     | 295                   | 569.1533                    | 4.7            | C <sub>25</sub> H <sub>29</sub> O <sub>15</sub> | 479, 449*, 317, 287, 167, 125                                    | 3-β-D-glucopyranosyl-4-O-β-D-glucopyranosylriflophenone | +       | +  | +  | +  |    |
| 2  | 3.5                     | 321                   | 423.0914                    | -3.1           | C <sub>19</sub> H <sub>19</sub> O <sub>11</sub> | 303*, 193                                                        | 3-β-D-glucopyranosylmaclurin                            | +       | +  | +  |    |    |
| 3  | 3.8                     | 276, 310, 356         | 583.1272                    | -4.6           | C <sub>25</sub> H <sub>27</sub> O <sub>16</sub> | 493, 463, 331, 301, 273, 153*                                    | tetrahydroxyxanthone-di-O,C-hexose                      | +       | +  |    |    |    |
| 4  | 5.4                     | 260, 303, 366         | 583.1299                    | 0.0            | C <sub>25</sub> H <sub>27</sub> O <sub>16</sub> | 463, 457, 421, 331, 301, 275, 245, 163*, 119                     | tetrahydroxyxanthone-di-O,C-hexose                      | +       | +  | +  |    |    |
| 5  | 5.8                     | 294                   | 407.0980                    | 0.5            | C <sub>19</sub> H <sub>19</sub> O <sub>10</sub> | 317, 287*, 245, 193                                              | 3-β-D-glucopyranosylriflophenone                        | +       | +  | +  |    | +  |
| 6  | 6.0                     | no peak               | 285.0612                    | 0.7            | C <sub>12</sub> H <sub>13</sub> O <sub>8</sub>  | 153                                                              | dihydroxybenzoic acid-O-pentose                         | +       | +  |    |    |    |
| 7  | 6.5                     | 262, 317, 279         | 871.2034                    | 0.8            | C <sub>51</sub> H <sub>35</sub> O <sub>14</sub> | 751, 557, 457, 421, 331, 301, 269*, 225, 163, 119, 89            | aspalathin derivative of (iso)mangiferin                | +       | +  | +  |    |    |
| 8  | 7.0                     | no peak               | 457.1350                    | 0.9            | C <sub>20</sub> H <sub>25</sub> O <sub>12</sub> | 417, 163*, 119                                                   | p-coumaric acid-O-pentose-O-hexose                      | +       | +  | +  |    |    |
| 9  | 7.1                     | 290                   | 595.1641                    | -3.7           | C <sub>27</sub> H <sub>31</sub> O <sub>15</sub> | 487, 457, 415, 385, 355, 163, 119*, 89                           | eriodictyol-O-(hexose-O-deoxyhexose)                    | +       | +  | +  |    |    |
| 10 | 8.4                     | 239, 257, 317, 366    | 421.0768                    | -0.7           | C <sub>19</sub> H <sub>17</sub> O <sub>11</sub> | 403, 331, 301*, 259                                              | mangiferin                                              | +       | +  | +  | +  | +  |
| 11 | 8.7                     | 259, 328              | 437.0703                    | -3.9           | C <sub>19</sub> H <sub>17</sub> O <sub>12</sub> | 421*, 291, 231                                                   | pentahydroxyxanthone-C-hexose                           | +       |    |    | +  |    |
| 12 | 8.9                     | 255, 316, 366         | 421.0764                    | -1.7           | C <sub>19</sub> H <sub>17</sub> O <sub>11</sub> | 331, 301*, 271                                                   | isomangiferin                                           | +       | +  | +  | +  |    |
| 13 | 9.0                     | 270, 327              | 593.1503                    | -0.5           | C <sub>27</sub> H <sub>29</sub> O <sub>15</sub> | 473, 421, 383, 353, 331, 301*, 271                               | vicenin-2                                               | +       | +  | +  | +  |    |
| 14 | 9.9                     | 236, 277, 328         | 437.0727                    | 1.6            | C <sub>19</sub> H <sub>17</sub> O <sub>12</sub> | 317, 289*, 271, 269, 175, 163, 137, 125, 119, 89                 | pentahydroxyxanthone-C-hexose                           | +       |    | +  | +  |    |
| 15 | 10.0                    | 232, 282              | 449.1066                    | -4.0           | C <sub>21</sub> H <sub>21</sub> O <sub>11</sub> | 287, 151*, 135                                                   | eriodictyol-O-hexose                                    | +       |    |    | +  |    |
| 16 | 11.2                    | 284                   | 613.1766                    | -0.5           | C <sub>27</sub> H <sub>33</sub> O <sub>16</sub> | 433, 403, 395, 373*, 331, 287, 239, 209, 179, 167, 163, 135, 119 | 3',5'-di-β-D-glucopyranosyl-3-hydroxyphloretin          | +       | +  | +  | +  |    |
| 17 | 11.9                    | 284                   | 595.1651                    | -2.0           | C <sub>27</sub> H <sub>31</sub> O <sub>15</sub> | 387, 287, 271, 151*, 135                                         | eriocitrin                                              | +       |    | +  | +  | +  |
| 18 | 13.0                    | 254, 349              | 593.1501                    | -0.8           | C <sub>27</sub> H <sub>29</sub> O <sub>15</sub> | 285                                                              | scolymoside                                             | +       |    | +  | +  | +  |
| 19 | 13.2                    | 285                   | 597.1793                    | -4.4           | C <sub>27</sub> H <sub>33</sub> O <sub>15</sub> | 477, 459, 417, 387, 357*, 315, 239, 209, 167                     | 3',5'-di-β-D-glucopyranosylphloretin                    | +       |    | +  | +  | +  |
| 20 | 14.1                    | 278                   | 579.1713                    | -0.2           | C <sub>27</sub> H <sub>31</sub> O <sub>14</sub> | 271                                                              | naringenin-O-(hexose-O-deoxyhexose)                     | +       |    |    |    | +  |
| 21 | 15.0                    | 267, 343              | 577.1567                    | 1.7            | C <sub>27</sub> H <sub>29</sub> O <sub>14</sub> | 433, 269*, 125                                                   | isorhoifolin                                            | +       |    |    | +  | +  |
| 22 | 15.3                    | 283, 326sh            | 609.1819                    | 0.0            | C <sub>28</sub> H <sub>33</sub> O <sub>15</sub> | 301                                                              | hesperidin                                              | +       |    |    | +  | +  |

\* Indicates base peak ion. *Abbreviations*: F1, fraction 1; F2, fraction 2; F3, fraction 3; F4, fraction 4; sh, shoulder; t<sub>R</sub>, retention time.

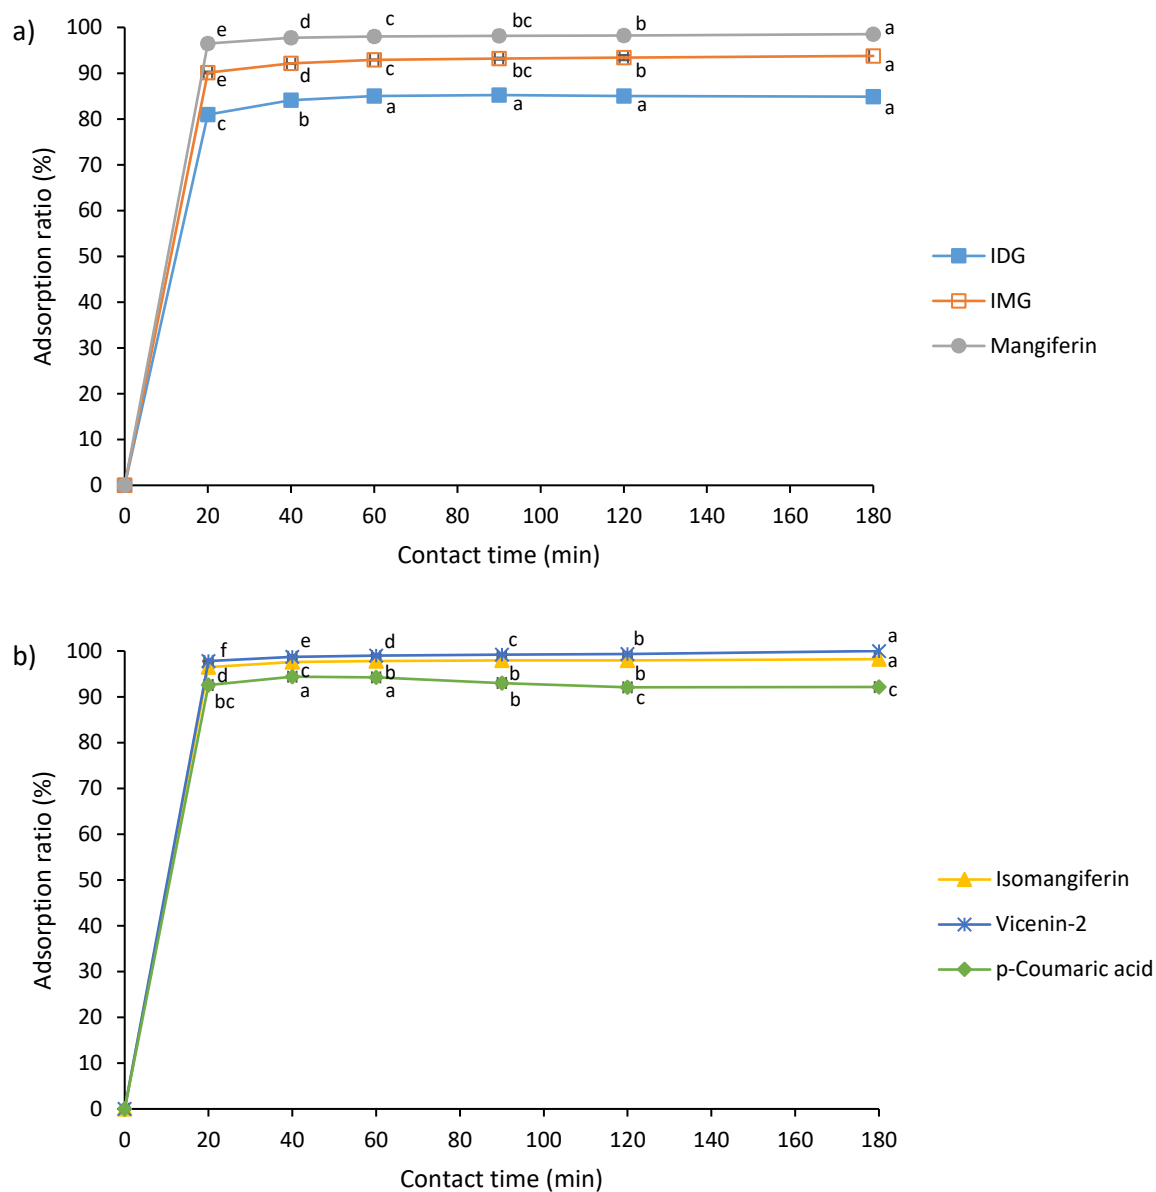

**Figure S1** Adsorption ratios of 3- $\beta$ -D-glucopyranosyl-4-O- $\beta$ -D-glucopyranosylriflophenone (IDG), 3- $\beta$ -D-glucopyranosylriflophenone (IMG) and mangiferin (a) and isomangiferin, vicenin-2 and *p*-coumaric acid (b) on XAD 1180N macroporous resin as a function of contact time (min), using static adsorption. Data are given as mean  $\pm$  standard deviation ( $n = 3$ ). Different letters at individual time intervals on the adsorption ratio graphs indicate significant differences ( $p < 0.05$ ).

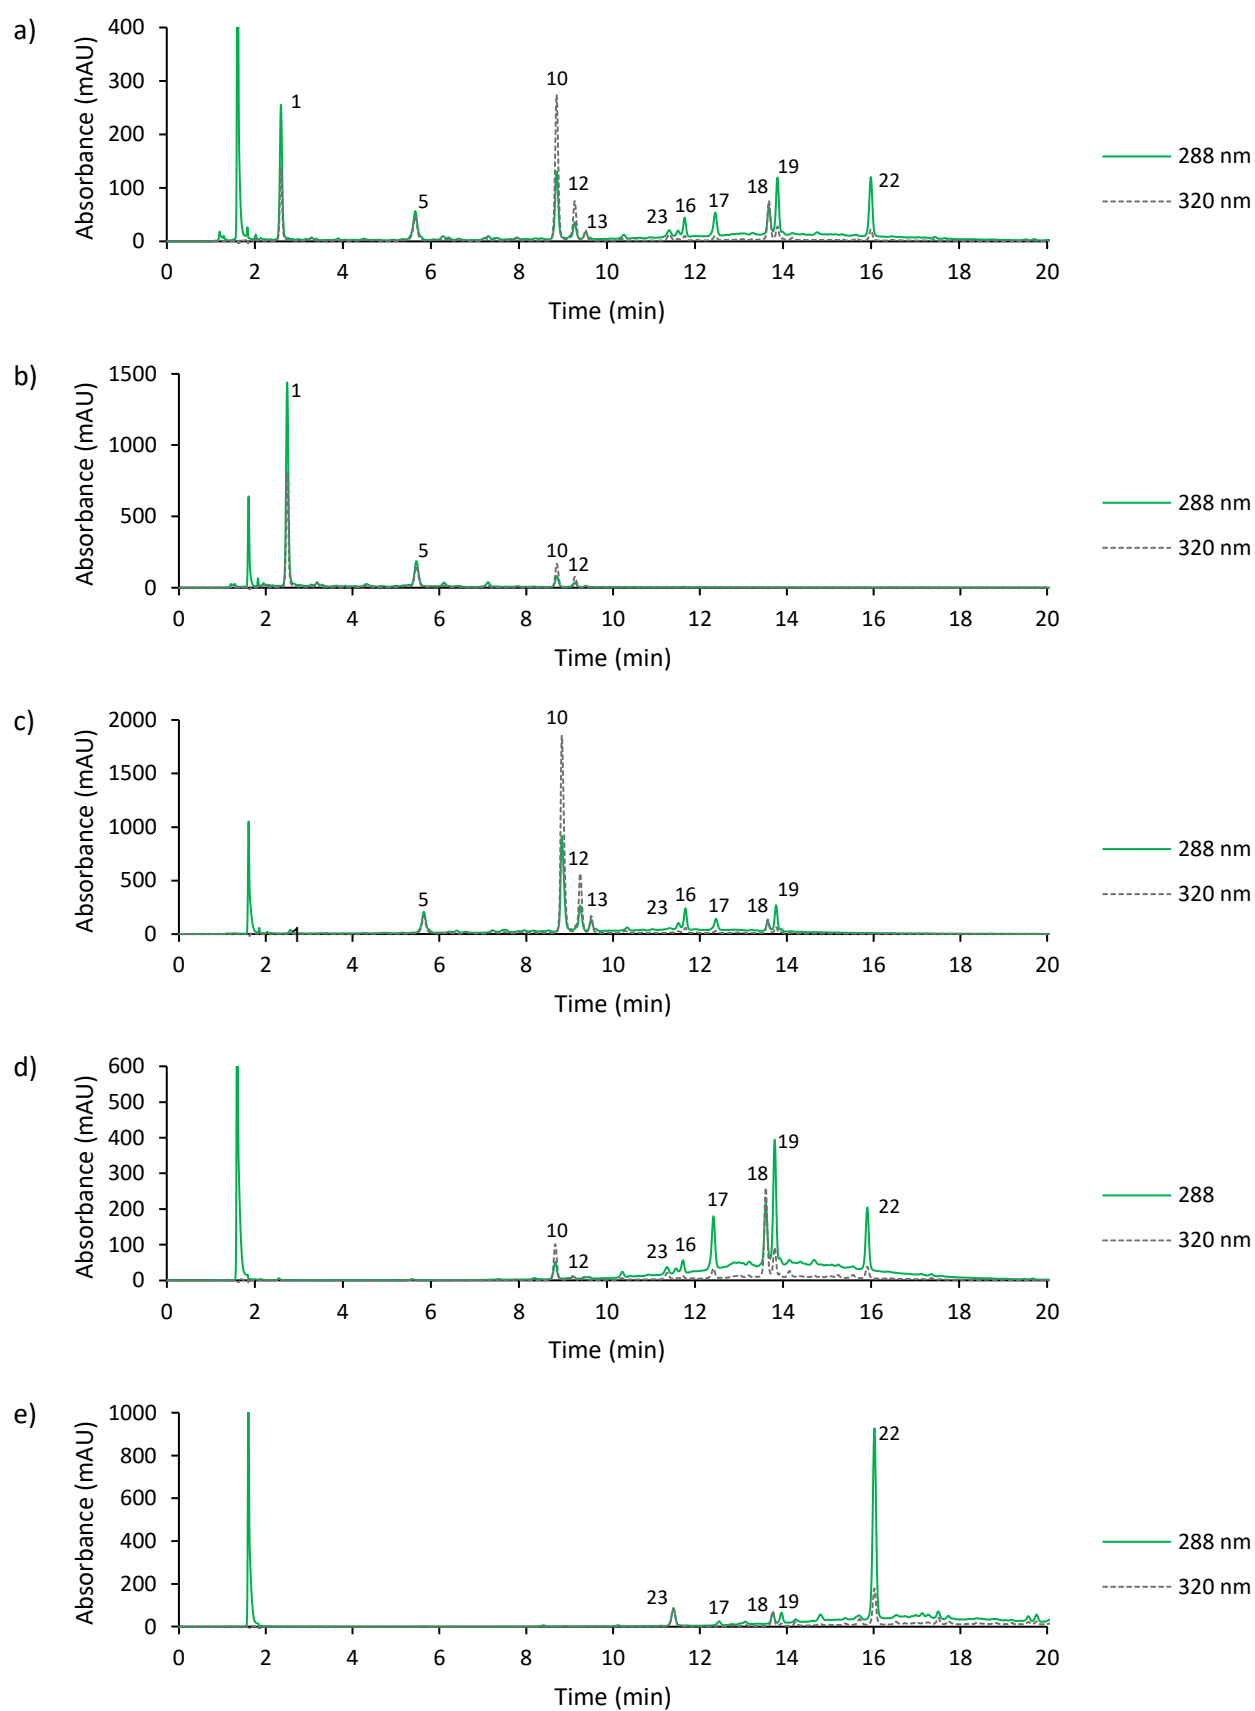

**Figure S2** HPLC-DAD chromatograms of a green *Cyclopia subternata* hot water extract (a) and fractions 1-4 (b-e) obtained from large-scale fractionation on XAD 1180N. Peak labels correspond to Table S3.
